# Supplementary material for: Virulence Potential and Genome-Wide Characterization of Drug Resistant Streptococcus pneumoniae Clones Selected In Vivo by the 7-Valent Pneumococcal Conjugate Vaccine
Source: PubMed Central journal article supplement (PMC3777985; doi:10.1371/journal.pone.0074867), 2013-09-19
Supplement: pone.0074867.s001.pdf [file pone.0074867.s001.pdf]

## SUPPORTING INFORMATION

**Figure S1.** PFGE clonal types associated to serotypes 6A, 15A and 19A.

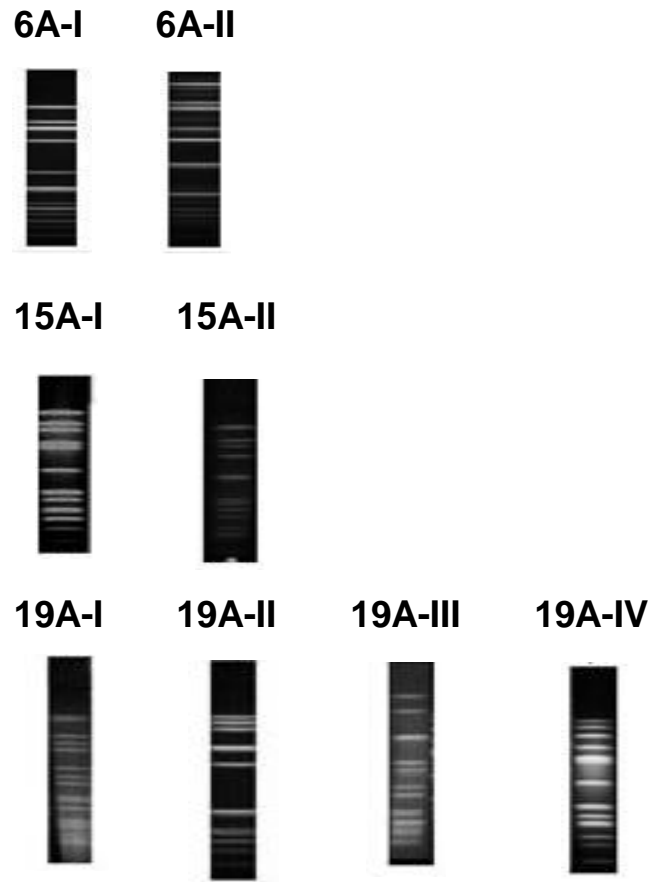

## SUPPORTING INFORMATION

**Table S1.** List of the 59 sequenced *Streptococcus pneumoniae* strains used in the phylogenetic analysis.

| Strain      | Serotype     | MLST | Genome (bp) | Location of isolation                                                | Source   | Genbank Accession Number |
|-------------|--------------|------|-------------|----------------------------------------------------------------------|----------|--------------------------|
| WL400       | 6A           | 2191 | 2149529     | Portugal                                                             | carriage | In process.              |
| B605        | 15A          | 63   | 2085829     | Portugal                                                             | carriage | In process.              |
| WL677       | 19A          | 276  | 2085829     | Portugal                                                             | carriage | In process.              |
| INV200      | 14           | 9    | 2093318     | Oxford, UK                                                           | disease  | FQ312029                 |
| ST13v10     | 14           | 13   | 2063728     | Pittsburgh, USA                                                      | disease  | NZ_ABWA01000000          |
| ST13v13     | NT           | 13   | 2070802     | Pittsburgh, USA                                                      | disease  | NZ_ABWC01000000          |
| ST13v6      | NT           | 13   | 2053197     | Pittsburgh, USA                                                      | disease  | NZ_ABWB01000000          |
| ST13v1      | 14           | 13   | 2100368     | Pittsburgh, USA                                                      | carriage | NZ_ABWQ00000000          |
| ST13v12     | NT           | 13   | 2065452     | Pittsburgh, USA                                                      | disease  | NZ_ABWU00000000          |
| Sp23BS72    | 23           | 37   | 2103479     | Pittsburgh, USA                                                      | disease  | ABAG00000000             |
| AP200       | 11A          | 62   | 2084139     | University of Siena, Italy                                           | disease  | CP002121                 |
| MLV016      | 11A          | 62   | 2247118     | USA, Europe                                                          | carriage | ABGH00000000             |
| Sp11BS70    | 11           | 62   | 2060705     | Pittsburgh, USA                                                      | disease  | ABAC00000000             |
| G54         | 19F          | 63   | 2078953     | Italy                                                                | disease  | CP001015                 |
| ICE59       | 6B           | 63   | 2212616     | Iceland                                                              | disease  | In process.              |
| Sp647       | 6B           | 63   | 2166935     | Spain                                                                | disease  | In process.              |
| JJA         | 14           | 66   | 2120234     | Brazil                                                               | disease  | CP000919                 |
| ICE44       | 6B           | 71   | 2213083     | Iceland                                                              | disease  | In process.              |
| ATCC700669  | 23F          | 81   | 2221315     | Spain                                                                | carriage | FM211187                 |
| 4595T23     | 23           | 81   | 2169192     | Lisbon, Portugal                                                     | carriage | ABX001000000             |
| SV35T23     | 23           | 81   | 2161785     | AIDS clinic of St. Vincent's Medical Center, Richmond, New York, USA | disease  | ADNN01000000             |
| SV36T3      | 3            | 81   | 2156372     | AIDS clinic of St. Vincent's Medical Center, Richmond, New York, USA | disease  | ADNO01000000             |
| 670-6B      | 6B           | 90   | 2240045     | Spain                                                                | disease  | CP002176                 |
| SPAIN6B     | 6B           | 90   | 2210903     | Spain                                                                | carriage | In process.              |
| CCRI_1974M2 | 14           | 124  | 2003231     | McGill University, Canada                                            | disease  | ABZT00000000             |
| CCRI_1974   | 14           | 124  | 2005075     | McGill University, Canada                                            | disease  | ABZC00000000             |
| Sp14BS69    | 14           | 124  | 2148093     | Pittsburgh, USA                                                      | disease  | ABAD00000000             |
| SP195       | 9V           | 156  | 2198294     | Worldwide                                                            | disease  | ABGE00000000             |
| 439-1       | 9V           | 156  | 2065561     | Portugal                                                             | carriage | In process.              |
| 88-1        | 14           | 156  | 2061797     | Portugal                                                             | carriage | In process.              |
| 1417        | 9V           | 156  | 2062281     | Portugal                                                             | carriage | In process.              |
| SPAIN9V     | 9V           | 156  | 2086592     | Spain                                                                | disease  | In process.              |
| N034156     | 3            | 180  | 2058353     | The Netherlands                                                      | carriage | FQ312045                 |
| N034183     | 3            | 180  | 1993183     | The Netherlands                                                      | carriage | FQ312043                 |
| N994038     | 3            | 180  | 2010908     | Glasgow Reference Lab                                                | disease  | FQ312041                 |
| N994039     | 3            | 180  | 2010104     | Glasgow Reference Lab                                                | disease  | FQ312044                 |
| OXC141      | 3            | 180  | 2036967     | Oxford, UK                                                           | carriage | FQ312027                 |
| Sp3BS71     | 3            | 180  | 2033581     | Pittsburgh, USA                                                      | disease  | AAZZ00000000             |
| SPN021198   | 3            | 180  | 1989367     | Glasgow Reference Lab                                                | disease  | CACH01000000             |
| SPN072838   | 3            | 180  | 1990038     | Bolivia                                                              | carriage | CACI01000000             |
| CDC1087     | 7F           | 191  | 2190853     | Bra, Den, Fin, Neth, Nor, UK, Uru, USA                               | disease  | ABFT00000000             |
| CDC3059     | 19A          | 199  | 2293277     | Iceland, UK, USA, others                                             | disease  | ABGG00000000             |
| TIGR4       | 4            | 205  | 2160842     | Norway                                                               | disease  | AE005672                 |
| SPN1041     | 1            | 217  | 2166490     | Ghana                                                                | disease  | CACE01000000             |
| CDC0288     | 12F          | 220  | 2051140     | USA, UK                                                              | disease  | ABGF00000000             |
| INV104      | 1            | 227  | 2142122     | Oxford, UK                                                           | disease  | FQ312030                 |
| Hungary19A  | 19A          | 268  | 2245615     | Hungary                                                              | disease  | CP000936                 |
| N032672     | 1            | 306  | 2144331     | Glasgow Reference Lab                                                | disease  | FQ312039                 |
| N033038     | 1            | 306  | 2164519     | Glasgow Reference Lab                                                | disease  | FQ312042                 |
| SPN061370   | 1            | 306  | 2012346     | Glasgow Reference Lab                                                | disease  | CACJ01000000             |
| CDC1873     | 6A           | 376  | 2265195     | USA                                                                  | disease  | ABFS00000000             |
| Sp6BS73     | 6            | 460  | 2162916     | Pittsburgh, USA                                                      | disease  | ABAA00000000             |
| Sp19BS75    | 19           | 485  | 2136434     | Pittsburgh, USA                                                      | disease  | ABAF00000000             |
| D39         | 2            | 595  | 2046115     | USA                                                                  | disease  | CP000410                 |
| N7465       | 1            | 615  | 2100988     | Type strain, Rockefeller USA, 1948                                   | disease  | CACF01000000             |
| Sp9BS68     | 9            | 1269 | 2117908     | Pittsburgh, USA                                                      | disease  | ABAB00000000             |
| ST2011v4    | Non Typeable | 2011 | 2086050     | Pittsburgh, USA                                                      | disease  | NZ_ADHN01000000          |
| Sp18BS74    | 6            | New  | 2105593     | Pittsburgh, USA                                                      | disease  | ABAE00000000             |
| SpnA45      | 3            | New  | 2041833     | Newmarket, Pittsburgh, USA                                           | disease  | CACG01000000             |
